# Supplementary material for: Technical note: A noniterative approach to modelling moist thermodynamics
Source: Copernicus journal article supplement (doi:10.5194/acp-17-15037-2017), 2017-12-19
Supplement: Supplementary file 1 [file acp-17-15037-2017-supplement.zip]

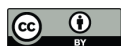

## *Supplement of*

# **Technical note: A noniterative approach to modelling moist thermodynamics**

**Nadya Moisseeva and Roland Stull**

*Correspondence to:* Nadya Moisseeva ([nmoisseeva@eoas.ubc.ca](mailto:nmoisseeva@eoas.ubc.ca))

- [acp-17-15037-2017-supplement-title-page.pdf](#)
- [NoniterativePseudoadiabatSolver\\_09-11-2017.xlsx](#)

The copyright of individual parts of the supplement might differ from the CC BY 4.0 License.
